# Supplementary material for: Occurrence and Dietary Exposure Assessment to Enniatin B through Consumption of Cereal-Based Products in Spain and the Catalonia Region
Source: MDPI journal article supplement (doi:10.3390/toxins15010024), 2022-12-29

# Supplementary Materials: Occurrence and Dietary Exposure Assessment to Enniatin B through Consumption of Cereal-Based Products in Spain and the Catalonia Region

Jose A. Gallardo, Sonia Marín, Antonio J. Ramos, German Cano-Sancho and Vicente Sanchis

**Table S1.** Normalised consumption (g/kg bw/day) of cereal-based products for adult population from Catalonia Region and for all Spain. Mean levels and standard deviation (SD) were computed considering only consumers.

| Food          | Catalonia Region |         |        |      |      | Spain     |         |        |      |      |
|---------------|------------------|---------|--------|------|------|-----------|---------|--------|------|------|
|               | Age group        | N total | % cons | Mean | SD   | Age group | N total | % cons | Mean | SD   |
| White bread   | 18-40            | 864     | 61%    | 1.04 | 0.64 | 18-40     | 281     | 87%    | 1.17 | 0.84 |
|               | 41-60            | 397     | 65%    | 1.23 | 0.59 | 41-60     | 209     | 89%    | 1.13 | 0.67 |
|               | >60              | 294     | 66%    | 1.26 | 0.58 | >60       | 313     | 87%    | 1.07 | 0.70 |
| Whole bread   | 18-40            | 864     | 29%    | 1.03 | 0.63 | 18-40     | 281     | 5%     | 0.70 | 0.55 |
|               | 41-60            | 397     | 30%    | 1.10 | 0.65 | 41-60     | 209     | 12%    | 1.00 | 0.81 |
|               | >60              | 294     | 29%    | 1.09 | 0.65 | >60       | 313     | 12%    | 0.71 | 0.66 |
| Sliced bread  | 18-40            | 864     | 32%    | 0.39 | 0.27 | 18-40     | 281     | 34%    | 0.68 | 0.32 |
|               | 41-60            | 397     | 22%    | 0.36 | 0.24 | 41-60     | 209     | 17%    | 0.66 | 0.33 |
|               | >60              | 294     | 22%    | 0.30 | 0.19 | >60       | 313     | 18%    | 0.61 | 0.22 |
| Bread rusks   | 18-40            | 864     | 21%    | 0.06 | 0.04 | 18-40     | 281     | 2%     | 0.24 | 0.21 |
|               | 41-60            | 397     | 26%    | 0.06 | 0.04 | 41-60     | 209     | 3%     | 0.21 | 0.06 |
|               | >60              | 294     | 25%    | 0.05 | 0.04 | >60       | 313     | 2%     | 0.24 | 0.06 |
| Crackers      | 18-40            | 864     | 22%    | 0.01 | 0.01 | 18-40     | 281     | 5%     | 0.24 | 0.16 |
|               | 41-60            | 397     | 18%    | 0.01 | 0.01 | 41-60     | 209     | 5%     | 0.21 | 0.16 |
|               | >60              | 294     | 15%    | 0.01 | 0.01 | >60       | 313     | 3%     | 0.21 | 0.11 |
| Cookies       | 18-40            | 864     | 20%    | 0.18 | 0.11 | 18-40     | 281     | 24%    | 0.50 | 0.34 |
|               | 41-60            | 397     | 26%    | 0.16 | 0.09 | 41-60     | 209     | 20%    | 0.46 | 0.29 |
|               | >60              | 294     | 37%    | 0.14 | 0.10 | >60       | 313     | 19%    | 0.36 | 0.18 |
| Other cookies | 18-40            | 864     | 38%    | 0.52 | 0.37 | 18-40     | 281     | 15%    | 0.75 | 0.68 |
|               | 41-60            | 397     | 35%    | 0.45 | 0.28 | 41-60     | 209     | 16%    | 0.49 | 0.31 |

|                   |       |     |     |      |      |       |     |     |      |      |
|-------------------|-------|-----|-----|------|------|-------|-----|-----|------|------|
|                   | >60   | 294 | 30% | 0.39 | 0.26 | >60   | 313 | 12% | 0.46 | 0.31 |
|                   | 18-40 | 864 | 19% | 0.46 | 0.32 | 18-40 | 281 | 10% | 0.68 | 0.36 |
| Muffins           | 41-60 | 397 | 22% | 0.52 | 0.37 | 41-60 | 209 | 13% | 0.64 | 0.40 |
|                   | >60   | 294 | 28% | 0.41 | 0.25 | >60   | 313 | 8%  | 0.60 | 0.33 |
|                   | 18-40 | 864 | 32% | 0.47 | 0.23 | 18-40 | 281 | 7%  | 0.89 | 0.44 |
| Cake              | 41-60 | 397 | 27% | 0.51 | 0.35 | 41-60 | 209 | 7%  | 1.19 | 0.66 |
|                   | >60   | 294 | 26% | 0.47 | 0.27 | >60   | 313 | 8%  | 1.01 | 0.52 |
|                   | 18-40 | 864 | 34% | 0.59 | 0.15 | 18-40 | 281 | 4%  | 0.48 | 0.26 |
| Breakfast cereals | 41-60 | 397 | 24% | 0.53 | 0.13 | 41-60 | 209 | 2%  | 0.50 | 0.29 |
|                   | >60   | 294 | 24% | 0.50 | 0.13 | >60   | 313 | 4%  | 0.49 | 0.21 |
|                   | 18-40 | 864 | 85% | 0.54 | 0.20 | 18-40 | 281 | 44% | 0.81 | 0.48 |
| Pasta             | 41-60 | 397 | 75% | 0.45 | 0.18 | 41-60 | 209 | 42% | 0.64 | 0.41 |
|                   | >60   | 294 | 84% | 0.40 | 0.16 | >60   | 313 | 37% | 0.64 | 0.41 |

**Table S2.** Inventory of individual samples and composites prepared for the analysis for each food group.

|                   | Individual samples | Analytical composite samples |
|-------------------|--------------------|------------------------------|
| White bread       | 68                 | 4                            |
| Wholemeal bread   | 59                 | 4                            |
| Sliced bread      | 22                 | 3                            |
| Bread rusks       | 20                 | 3                            |
| Crackers          | 21                 | 3                            |
| Cookies           | 21                 | 3                            |
| Other cookies     | 22                 | 3                            |
| Muffins           | 20                 | 3                            |
| Cakes             | 22                 | 3                            |
| Breakfast cereals | 20                 | 3                            |
| Pasta             | 20                 | 3                            |
| Baby food         | 32                 | 32*                          |
| Total             | 347                | 63                           |

\* Baby food samples were analysed individually.

**Figure S1.** Contribution of cereal-based products to exposure of enniatin B to the Spanish population of 18-40 years old group (A), 41-60 years old group (B) and >60 years old group (C).

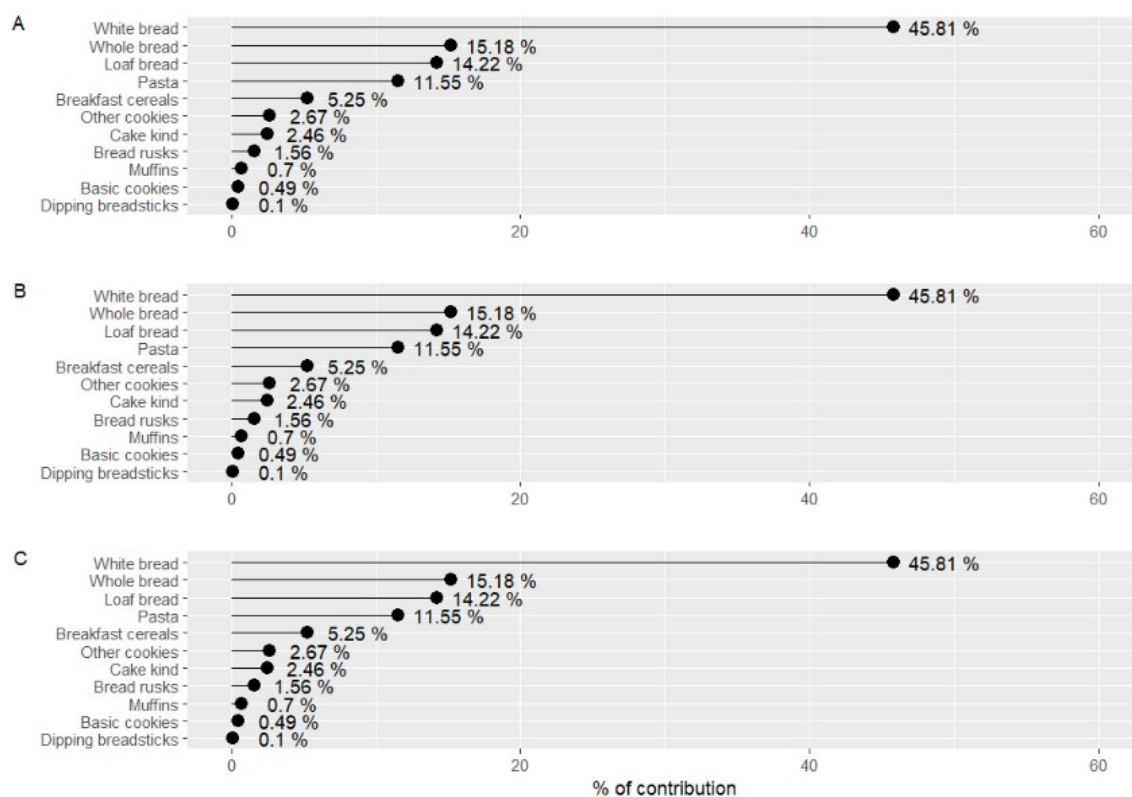

**Figure S2.** Contribution of cereal-based products to exposure of enniatin B to the 0-11 months old group (A), 12-35 months old group (B), 3-9 years old group (C) and 10-17 years old group (D).

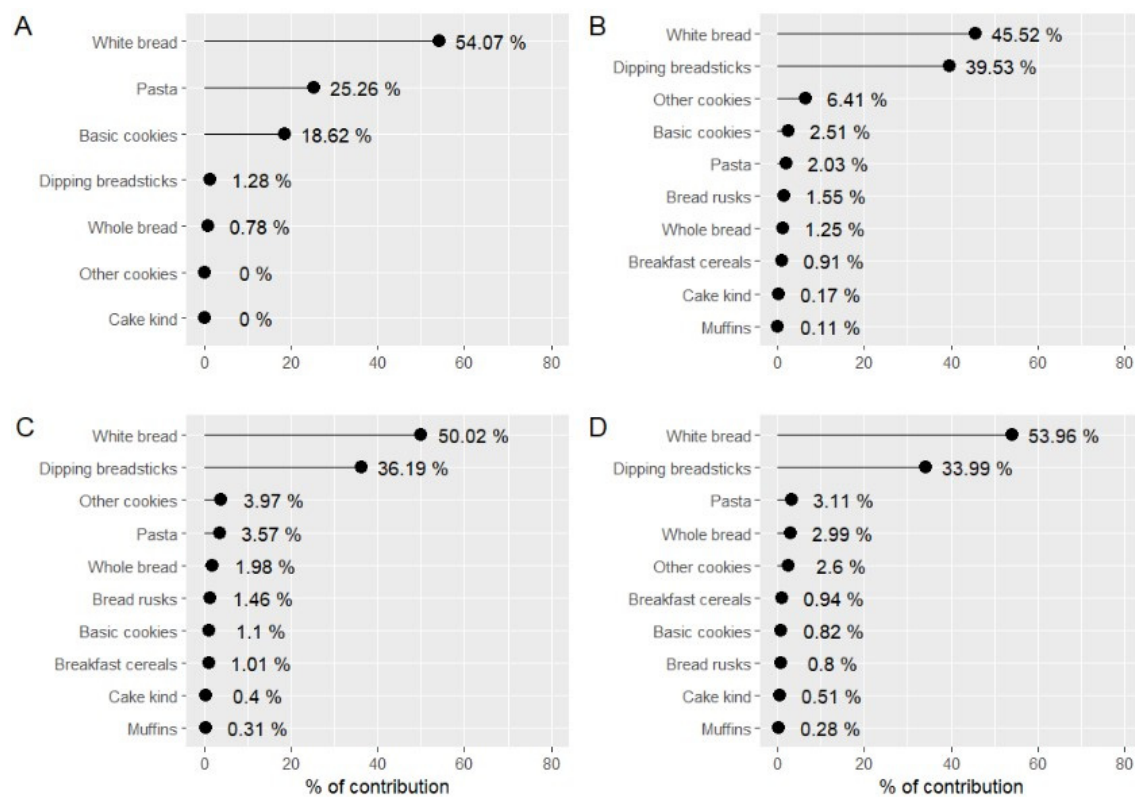

Supplement: s1 [file s1]
